# Supplementary material for: Diversity and distribution of thermophilic hydrogenogenic carboxydotrophs revealed by microbial community analysis in sediments from multiple hydrothermal environments in Japan
Source: PubMed Central journal article supplement (PMC6687684; doi:10.1007/s00203-019-01661-9), 2019-04-27
Supplement: 203_2019_1661_MOESM8_ESM.pdf [file 203_2019_1661_MOESM8_ESM.pdf]

"Diversity and distribution of thermophilic hydrogenogenic carboxydrotrophs revealed by microbial community analysis in sediments from multiple hydrothermal environments in Japan"  
*Arch. Microbiol.* Kimiho Omae, Yuto Fukuyama, Hisato Yasuda, Kenta Mise, Takashi Yoshida, and Yoshihiko Sako\*  
Laboratory of Marine Microbiology, Graduate School of Agriculture, Kyoto University; sako@kais.kyoto-u.ac.jp

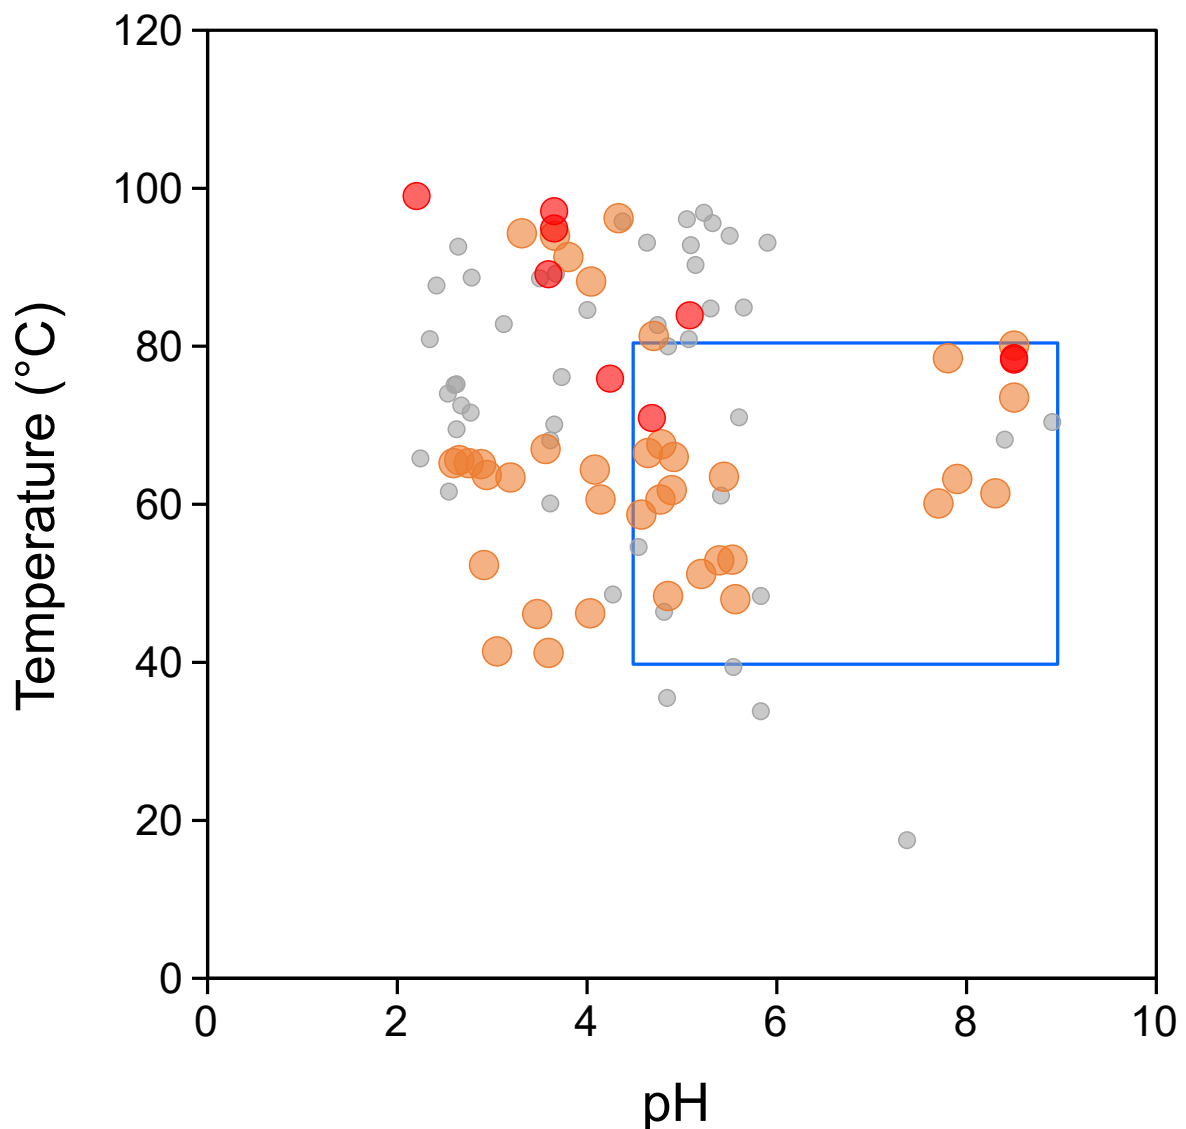

**Online Resource 8** Temperature and pH measured in hot springs. The sampling sites where any potential thermophilic hydrogenogenic carboxydrotrophic phylotypes of the Phylum Firmicutes (OTU\_664, OTU\_1148, OTU\_1160, OTU\_1621, OTU\_1654, OTU\_1692, OTU\_1749, OTU\_3578, OTU\_6523, OTU\_6791 and OTU\_8267) were detected are shown in orange circles. The sites where the relative abundance of *Caldanaerobacter subterraneus* (OTU\_664), *Carboxydocella* (OTU\_1654), *Carboxydothemus pertinax* (OTU\_3578) or *Carboxydothemus* phylotype (OTU\_1160) exceeded 0.1% are shown in red circles. The other sites are shown in gray circles. The growth range of *Caldanaerobacter*, *Carboxydocella* and *Carboxydothemus* (40-80°C, pH 4.5-9.0) are indicated by blue square.
